# Supplementary material for: Network pharmacology, molecular docking, and experimental study for the mechanisms of Qishen Yiqi Pills against Cardiovascular Diseases
Source: Research Square preprint supplement (doi:10.21203/rs.3.rs-889464/v1), 2021-09-15
Supplement: Supplementary file 1 [file 1b37dd5a597129a23a335dba.docx]

Supplementary data for

**Network pharmacology, molecular docking, and experimental study for the mechanisms of Qishen Yiqi Pills against Cardiovascular Diseases**

Jie-wen Zhao1,2, Hai-dong Liu3, Ming-yin Man1, Lv-ya Wang2, Ning Li3, Jing Zhao4, Wen-li Cheng2*, Kai-jiang Yu1*

1. Department of Critical Care Medicine, The First Affiliated Hospital of Harbin Medical University, Harbin, 150001, China

2. Department of Hypertension, Beijing Anzhen Hospital, Capital Medical University, Beijing, 100029, China

3. Department of General Surgery, Beijing YouAn Hospital, Capital Medical University, Beijing, 100069, China

4. Institute of Interdisciplinary Integrative Medicine Research, Shanghai University of Traditional Chinese Medicine, Shanghai, 201203, China

Correspondence and requests for materials should be addressed to: Wen-li Cheng (email: [chengwenli2020@ccmu.edu.cn](mailto:chengwenli2020@ccmu.edu.cn)) or Kai-jiang Yu (email: [dr_kaijiang2020@hrbmu.edu.cn](mailto:dr_kaijiang2020@hrbmu.edu.cn)).

Supplementary Table 2 Potential targets in QSYQP

| ABAT |
| --- |
| ABCA1 |
| ABCB1 |
| ABCB1 |
| ABCB11 |
| ABCB4 |
| ABCC1 |
| ABCC10 |
| ABCC11 |
| ABCC2 |
| ABCC2 |
| ABCC3 |
| ABCC4 |
| ABCG2 |
| ABCG2 |
| ABCG5 |
| ABCG5 |
| ABCG8 |
| ABCG8 |
| ABL1 |
| ABO |
| ACADM |
| ACADSB |
| ACHE |
| ACHE |
| ACO2 |
| ACOT13 |
| ACOX1 |
| ACSL3 |
| ACSL4 |
| ACSL4 |
| ACSL6 |
| ACTA1 |
| ACTB |
| ACTC1 |
| ACVR2B |
| ADA |
| ADAT3 |
| ADCY10 |
| ADH1B |
| ADH1C |
| ADH1C |
| ADRA2C |
| ADSL |
| AGPS |
| AGRN |
| AGT |
| AGTR1 |
| AHCY |
| AHR |
| AICDA |
| AIFM1 |
| AKR1C1 |
| AKR1C2 |
| AKR1C3 |
| AKR1D1 |
| AKT1 |
| AKT1 |
| ALAD |
| ALB |
| ALB |
| ALDH1A3 |
| ALDH1L1 |
| ALDH2 |
| ALDH2 |
| ALDH3A2 |
| ALDH5A1 |
| ALDH7A1 |
| ALOX5 |
| ALOX5 |
| AMT |
| AMY1A |
| AMY2A |
| AMY2B |
| ANGPTL4 |
| ANLN |
| ANXA1 |
| AOX1 |
| APH1A |
| APOA1 |
| APOA2 |
| APOA5 |
| APOB |
| APOE |
| APOE |
| APOM |
| APP |
| APRT |
| AQP2 |
| AR |
| AR |
| ARF1 |
| ARF6 |
| ARG1 |
| ASL |
| ASPH |
| ATIC |
| ATOX1 |
| ATP1A1 |
| ATP1A2 |
| ATP1A3 |
| ATP2A1 |
| ATP5A1 |
| ATP5A1 |
| ATP5B |
| ATP5C1 |
| ATP6 |
| AVP |
| BAX |
| BBOX1 |
| BCHE |
| BCHE |
| BCL2 |
| BCR |
| BDNF |
| BECN1 |
| BGLAP |
| BMP4 |
| C22orf28 |
| C7 |
| CA1 |
| CA12 |
| CA14 |
| CA2 |
| CA3 |
| CA4 |
| CA5A |
| CA5B |
| CA6 |
| CA7 |
| CA9 |
| CASP3 |
| CASP8 |
| CAT |
| CBR1 |
| CCL2 |
| CCND1 |
| CD36 |
| CD4 |
| CD40 |
| CDH1 |
| CDK4 |
| CDK6 |
| CEBPB |
| CEPT1 |
| CES1 |
| CES1 |
| CFTR |
| CHAT |
| CHAT |
| CHDH |
| CHKA |
| CHKB |
| CHKB |
| CHRM3 |
| CHRM3 |
| CHRNA1 |
| CHRNA4 |
| CHRNA7 |
| CHRNB1 |
| CHRND |
| CHRNE |
| CLDN1 |
| CLEC4E |
| CNR1 |
| CNR2 |
| COMT |
| COMT |
| COX1 |
| COX2 |
| COX4I1 |
| COX5A |
| COX5B |
| COX6A2 |
| COX6B1 |
| COX6C |
| COX7A1 |
| COX7B |
| COX7C |
| COX8A |
| CPT1A |
| CPT1A |
| CPT2 |
| CPT2 |
| CRABP2 |
| CRAT |
| CREBBP |
| CROT |
| CSNK2A1 |
| CSNK2B |
| CXCR4 |
| CYP11A1 |
| CYP11B1 |
| CYP11B2 |
| CYP17A1 |
| CYP19A1 |
| CYP19A1 |
| CYP1A1 |
| CYP1A2 |
| CYP1B1 |
| CYP1B1 |
| CYP24A1 |
| CYP27A1 |
| CYP27B1 |
| CYP2A13 |
| CYP2A6 |
| CYP2B6 |
| CYP2B6 |
| CYP2C18 |
| CYP2C19 |
| CYP2C8 |
| CYP2C8 |
| CYP2C9 |
| CYP2D6 |
| CYP2E1 |
| CYP2J2 |
| CYP2R1 |
| CYP3A4 |
| CYP3A43 |
| CYP3A5 |
| CYP3A7 |
| CYP4A11 |
| DCK |
| DFNB38 |
| DGKA |
| DHCR24 |
| DHFR |
| DHFR |
| DIAPH1 |
| DMGDH |
| DNMT1 |
| DPM2 |
| DRD4 |
| DYM |
| ECI2 |
| EDN1 |
| EDN3 |
| EDNRA |
| EDNRA |
| EFTUD1 |
| EGFR |
| EIF2AK3 |
| EIF3F |
| ELOVL4 |
| ENOX2 |
| EP300 |
| ERBB2 |
| ESR1 |
| ESR1 |
| ESR2 |
| ESRRA |
| ESRRB |
| ESRRG |
| EXT1 |
| F10 |
| F2 |
| F7 |
| F9 |
| FAAH |
| FABP1 |
| FABP2 |
| FABP3 |
| FABP4 |
| FABP5 |
| FABP6 |
| FABP7 |
| FADS1 |
| FADS2 |
| FAR1 |
| FAS |
| FECH |
| FFAR1 |
| FFAR4 |
| FHIT |
| FKBP1A |
| FOLR1 |
| FOLR2 |
| FOLR3 |
| FOXP3 |
| FPGS |
| FTCD |
| FTH1 |
| FURIN |
| GAA |
| GABRA1 |
| GABRA2 |
| GABRA3 |
| GABRA4 |
| GABRA5 |
| GABRA6 |
| GABRB1 |
| GABRB2 |
| GABRB3 |
| GABRD |
| GABRE |
| GABRG1 |
| GABRG2 |
| GABRG3 |
| GABRP |
| GABRQ |
| GART |
| GC |
| GCG |
| GCGR |
| GCK |
| GCLC |
| GGCX |
| GGH |
| GHSR |
| GJA1 |
| GLA |
| GLO1 |
| GLRA3 |
| GLTP |
| GM2A |
| GNA11 |
| GNAQ |
| GNPAT |
| GNPDA1 |
| GNRH1 |
| GNRHR |
| GPC6 |
| GPER |
| GPI |
| GRIN1 |
| GRIN2A |
| GRIN2B |
| GRIN2C |
| GRIN2D |
| GRIN3A |
| GRIN3B |
| GRIP1 |
| GSTA2 |
| GSTM3 |
| GSTO1 |
| GSTP1 |
| GUCA1A |
| H6PD |
| HAO1 |
| HBA1 |
| HBB |
| HBG1 |
| HCK |
| HCRT |
| HDAC2 |
| HDAC9 |
| HGF |
| HIBCH |
| HIBCH |
| HK1 |
| HMGCR |
| HMGCR |
| HMGCS2 |
| HMOX1 |
| HMOX1 |
| HNF4A |
| HNF4G |
| HOXA10 |
| HPRT1 |
| HRAS |
| HSD11B1 |
| HSD11B2 |
| HSD17B1 |
| HSD17B2 |
| HSD17B6 |
| HSD3B1 |
| HSD3B2 |
| HSP90AA1 |
| HSPA2 |
| HSPA5 |
| HSPG2 |
| HTR2A |
| ICAM1 |
| IDH1 |
| IFNB1 |
| IFNG |
| IGF1 |
| IGHG1 |
| IGHG2 |
| IKBKB |
| IL1B |
| IL1B |
| IL1RN |
| IL2 |
| IL6 |
| INS |
| INS |
| INSR |
| IRS1 |
| ITGAL |
| ITGB2 |
| JAK1 |
| JAK3 |
| KCNN4 |
| KHK |
| KIAA1310 |
| KISS1 |
| KISS1R |
| KNG1 |
| KRAS |
| LCN2 |
| LCT |
| LCTL |
| LEPRE1 |
| LEPREL1 |
| LEPREL2 |
| LGALS2 |
| LGALS3 |
| LGALS7 |
| LPAR6 |
| LSS |
| LSS |
| LTC4S |
| LTF |
| LY96 |
| LYZ |
| LYZ |
| MALT1 |
| MAOA |
| MAOA |
| MAP3K8 |
| MB |
| MBL2 |
| MED12 |
| MED13L |
| MED17 |
| MED23 |
| MED25 |
| MET |
| MGP |
| MIF |
| MMP1 |
| MMP13 |
| MMP2 |
| MMP9 |
| MPO |
| MPO |
| MTAP |
| MTFMT |
| MTHFD1 |
| MTHFD2 |
| MTHFR |
| MTHFR |
| MTOR |
| MTR |
| MTTP |
| NCAN |
| NCOA1 |
| NCOA2 |
| NDST1 |
| NFKB1 |
| NFKB2 |
| NFKBIA |
| NOS2 |
| NOS3 |
| NPSR1 |
| NQO1 |
| NQO2 |
| NR1H4 |
| NR1I2 |
| NR1I3 |
| NR3C1 |
| NR3C2 |
| NT5C2 |
| NT5C3A |
| NT5E |
| NUDT9 |
| ODC1 |
| OGDH |
| OPA1 |
| OSTalpha |
| OSTBETA |
| OXCT1 |
| OXCT2 |
| P2RY12 |
| P4HA1 |
| P4HA2 |
| PAEP |
| PAFAH1B1 |
| PCSK1 |
| PCYT1A |
| PCYT1A |
| PCYT1B |
| PDX1 |
| PGD |
| PGR |
| PHOSPHO1 |
| PIGA |
| PIGL |
| PIK3CA |
| PIK3CA |
| PIK3CG |
| PIK3R1 |
| PIK3R1 |
| PIK3R2 |
| PIM1 |
| PKIA |
| PLA2G1B |
| PLA2G2A |
| PLA2G2A |
| PLA2G2D |
| PLA2G7 |
| PLAT |
| PLAU |
| PLCB1 |
| PLCB2 |
| PLCB4 |
| PLD1 |
| PLD2 |
| PLK1 |
| PLOD1 |
| PLOD3 |
| PMP2 |
| PNLIP |
| PNP |
| PNP |
| POMP |
| PON1 |
| PON2 |
| PPARA |
| PPARA |
| PPARD |
| PPARG |
| PPARG |
| PPOX |
| PPP1CC |
| PPP2CA |
| PPP2CB |
| PPP3CA |
| PPP3R1 |
| PPT1 |
| PPT1 |
| PRKAA1 |
| PRKAA2 |
| PRKAB1 |
| PRKAB2 |
| PRKACA |
| PRKAG1 |
| PRKAG2 |
| PRKCA |
| PRKCB |
| PRKG1 |
| PRLR |
| PROC |
| PROK2 |
| PROKR2 |
| PROS1 |
| PROZ |
| PSENEN |
| PTEN |
| PTGIR |
| PTGIS |
| PTGS1 |
| PTGS2 |
| PTK2B |
| PTPN1 |
| PVR |
| PYGL |
| PYGM |
| PYGM |
| RARG |
| RCVRN |
| REN |
| RHO |
| RHO |
| ROR2 |
| RORA |
| RPS6KA3 |
| RPS6KA3 |
| RUVBL2 |
| RXRA |
| RXRB |
| RXRG |
| S100B |
| SARDH |
| SCN11A |
| SCN1A |
| SCN1B |
| SCN2A |
| SCN2B |
| SCN3A |
| SCN3B |
| SCN4A |
| SCN4B |
| SCN5A |
| SCN7A |
| SCN8A |
| SCN9A |
| SDC3 |
| SDHA |
| SDHB |
| SDHC |
| SDHD |
| SEC14L2 |
| SEC14L4 |
| SELE |
| SERPINA1 |
| SERPINA6 |
| SF3B1 |
| SF3B3 |
| SFTPD |
| SHBG |
| SHMT1 |
| SHMT2 |
| SI |
| SIAE |
| SIGLEC1 |
| SIGMAR1 |
| SLC10A1 |
| SLC10A2 |
| SLC10A6 |
| SLC13A1 |
| SLC13A2 |
| SLC13A3 |
| SLC16A1 |
| SLC16A1 |
| SLC16A7 |
| SLC19A1 |
| SLC22A1 |
| SLC22A11 |
| SLC22A16 |
| SLC22A2 |
| SLC22A3 |
| SLC22A4 |
| SLC22A4 |
| SLC22A5 |
| SLC22A5 |
| SLC22A6 |
| SLC22A7 |
| SLC22A8 |
| SLC25A10 |
| SLC25A20 |
| SLC25A29 |
| SLC25A32 |
| SLC29A1 |
| SLC29A3 |
| SLC2A1 |
| SLC2A2 |
| SLC44A1 |
| SLC44A2 |
| SLC44A3 |
| SLC44A4 |
| SLC46A1 |
| SLC5A7 |
| SLC5A7 |
| SLC6A1 |
| SLC8A1 |
| SLCO1A2 |
| SLCO1B1 |
| SLCO1B3 |
| SLCO1C1 |
| SLCO2A1 |
| SLCO2B1 |
| SLCO3A1 |
| SLCO4A1 |
| SLCO4C1 |
| SMARCA5 |
| SOAT1 |
| SOAT2 |
| SOD1 |
| SPR |
| SQLE |
| SRC |
| SRD5A1 |
| SRD5A2 |
| SRD5A3 |
| SREBF1 |
| SREBF2 |
| ST14 |
| STAT1 |
| STK17B |
| SUCLA2 |
| SUCLG1 |
| SUCLG2 |
| SUCNR1 |
| SULT2A1 |
| SULT2B1 |
| SYK |
| TAC3 |
| TACR3 |
| TAP1 |
| TAZ |
| TBL1XR1 |
| TEAD1 |
| TF |
| TLR2 |
| TLR4 |
| TLR5 |
| TMLHE |
| TNF |
| TNFRSF10B |
| TNFRSF11B |
| TOP1 |
| TOP2A |
| TP53 |
| TP53 |
| TRAPPC3 |
| TRH |
| TRHR |
| TRPV1 |
| TSC2 |
| TTPA |
| TTR |
| TUBA4A |
| TUBB |
| TYMP |
| TYMS |
| TYR |
| TYRP1 |
| UBA1 |
| UCP2 |
| UGT1A1 |
| UGT1A1 |
| UGT1A10 |
| UGT1A3 |
| UGT1A4 |
| UGT1A6 |
| UGT1A8 |
| UGT1A9 |
| UGT2B15 |
| UGT2B7 |
| UGT3A1 |
| VDR |
| VEGFA |
| VKORC1 |
| VKORC1L1 |
| WNK1 |
| XBP1 |
| XDH |
| XDH |
| YAP1 |
| YWHAE |
